# Supplementary material for: Runs of Homozygosity Revealed Reproductive Traits of Hu Sheep
Source: MDPI journal article supplement (doi:10.3390/genes13101848), 2022-10-13
Supplement: s1 [file s1]

## ***Supplementary Material***

### **Runs of Homozygosity Revealed Agriculture Characteristics of Hu Sheep**

Yuzhe Li<sup>1,2</sup>, Zitao Chen<sup>2</sup>, Yifei Fang<sup>3</sup>, Caiyun Cao<sup>1,2</sup>, Zhe Zhang<sup>1</sup>, Yuchun Pan<sup>1,2</sup>,  
Qishan Wang<sup>1,2\*</sup>

<sup>1</sup> Hainan Institute, Zhejiang University, Yongyou Industry Park, Yazhou Bay Sci-Tech City, Sanya 572000, China

<sup>2</sup> Department of Animal Science, College of Animal Science, Zhejiang University, 866# Yuhangtang Road, Hangzhou, East 310058, China.

<sup>3</sup> Department of Animal Science, School of Agriculture and Biology, Shanghai Jiao Tong University, 800# Dongchuan Road, Shanghai, East 200240, China.

\* Correspondence: Qishan Wang

Email: wangqishan@zju.edu.cn

**Table S1.** Quality of Tn5-based low-coverage sequencing among 108 Hu sheep.

| Sample Name | Depth | Coverage | Reads    |
|-------------|-------|----------|----------|
| YH-Sheep-1  | 1.30  | 0.29     | 14470004 |
| YH-Sheep-2  | 1.27  | 0.21     | 9580172  |
| YH-Sheep-3  | 1.32  | 0.26     | 11416834 |
| YH-Sheep-4  | 1.31  | 0.30     | 15410636 |
| YH-Sheep-5  | 1.24  | 0.24     | 12016190 |
| YH-Sheep-6  | 1.28  | 0.27     | 13422318 |
| YH-Sheep-7  | 1.25  | 0.26     | 15753402 |
| YH-Sheep-8  | 1.25  | 0.23     | 9824162  |
| YH-Sheep-9  | 1.28  | 0.25     | 10235936 |
| YH-Sheep-10 | 1.28  | 0.25     | 11096436 |
| YH-Sheep-18 | 1.32  | 0.27     | 12465638 |
| YH-Sheep-19 | 1.31  | 0.28     | 16155766 |
| YH-Sheep-20 | 1.34  | 0.35     | 16040168 |
| YH-Sheep-41 | 1.25  | 0.28     | 12842938 |
| YH-Sheep-51 | 1.27  | 0.29     | 12759120 |
| YH-Sheep-52 | 1.18  | 0.21     | 8505194  |
| YH-Sheep-53 | 1.22  | 0.21     | 9515366  |
| YH-Sheep-54 | 1.35  | 0.32     | 14567264 |
| YH-Sheep-55 | 1.27  | 0.25     | 11048140 |
| YH-Sheep-56 | 1.35  | 0.36     | 16122268 |
| YH-Sheep-57 | 1.24  | 0.22     | 8965962  |
| YH-Sheep-58 | 1.24  | 0.23     | 9336530  |
| YH-Sheep-59 | 1.17  | 0.17     | 6693776  |
| YH-Sheep-62 | 1.22  | 0.20     | 8000548  |
| YH-Sheep-63 | 1.21  | 0.17     | 7507686  |
| YH-Sheep-64 | 1.20  | 0.18     | 7098036  |
| YH-Sheep-65 | 1.19  | 0.19     | 7613942  |
| YH-Sheep-66 | 1.23  | 0.20     | 8097650  |
| YH-Sheep-67 | 1.20  | 0.18     | 8399238  |
| YH-Sheep-68 | 1.21  | 0.20     | 11911472 |
| YH-Sheep-69 | 1.29  | 0.28     | 10346418 |
| YH-Sheep-70 | 1.26  | 0.27     | 13522470 |
| YH-Sheep-71 | 1.32  | 0.32     | 12700952 |
| YH-Sheep-72 | 1.28  | 0.29     | 17281534 |
| YH-Sheep-73 | 1.37  | 0.39     | 12763108 |
| YH-Sheep-74 | 1.31  | 0.29     | 13891984 |
| YH-Sheep-75 | 1.31  | 0.32     | 16783722 |
| YH-Sheep-76 | 1.35  | 0.37     | 12220166 |
| YH-Sheep-77 | 1.28  | 0.29     | 10619462 |
| YH-Sheep-78 | 1.32  | 0.27     | 14257506 |
| YH-Sheep-79 | 1.31  | 0.32     | 11850188 |

| Sample Name  | Depth | Coverage | Reads    |
|--------------|-------|----------|----------|
| YH-Sheep-80  | 1.28  | 0.29     | 10527508 |
| YH-Sheep-81  | 1.26  | 0.26     | 11651424 |
| YH-Sheep-82  | 1.28  | 0.28     | 11939012 |
| YH-Sheep-83  | 1.28  | 0.29     | 15659692 |
| YH-Sheep-84  | 1.36  | 0.37     | 13875886 |
| YH-Sheep-85  | 1.29  | 0.32     | 11653342 |
| YH-Sheep-86  | 1.25  | 0.22     | 17257720 |
| YH-Sheep-87  | 1.35  | 0.36     | 17257720 |
| YH-Sheep-88  | 1.33  | 0.35     | 15983072 |
| YH-Sheep-89  | 1.28  | 0.31     | 14075620 |
| YH-Sheep-91  | 1.35  | 0.36     | 16417264 |
| YH-Sheep-93  | 1.31  | 0.34     | 15473524 |
| YH-Sheep-95  | 1.30  | 0.35     | 15685220 |
| YH-Sheep-97  | 1.26  | 0.30     | 15687654 |
| YH-Sheep-98  | 1.25  | 0.28     | 11398732 |
| YH-Sheep-99  | 1.29  | 0.34     | 10064142 |
| YH-Sheep-101 | 1.28  | 0.32     | 14923448 |
| YH-Sheep-102 | 1.28  | 0.33     | 13645110 |
| YH-Sheep-103 | 1.29  | 0.34     | 13176506 |
| YH-Sheep-104 | 1.29  | 0.32     | 14029150 |
| YH-Sheep-105 | 1.31  | 0.36     | 14907622 |
| YH-Sheep-106 | 1.27  | 0.31     | 15725108 |
| YH-Sheep-107 | 1.30  | 0.33     | 13418390 |
| YH-Sheep-108 | 1.30  | 0.35     | 15052138 |
| YH-Sheep-110 | 1.24  | 0.29     | 14002870 |
| YH-Sheep-111 | 1.28  | 0.33     | 13112016 |
| YH-Sheep-112 | 1.26  | 0.28     | 11923470 |
| YH-Sheep-113 | 1.29  | 0.31     | 12948080 |
| YH-Sheep-114 | 1.27  | 0.30     | 11250040 |
| YH-Sheep-115 | 1.28  | 0.32     | 12741250 |
| YH-Sheep-116 | 1.30  | 0.32     | 13009600 |
| YH-Sheep-117 | 1.29  | 0.33     | 12554526 |
| YH-Sheep-118 | 1.25  | 0.29     | 11636622 |
| YH-Sheep-119 | 1.27  | 0.28     | 10084760 |
| YH-Sheep-120 | 1.25  | 0.29     | 10539244 |
| YH-Sheep-121 | 1.32  | 0.34     | 14115538 |
| YH-Sheep-122 | 1.34  | 0.37     | 16269724 |
| YH-Sheep-123 | 1.30  | 0.30     | 12201158 |
| YH-Sheep-124 | 1.35  | 0.34     | 14207752 |
| YH-Sheep-125 | 1.31  | 0.27     | 10608088 |
| YH-Sheep-126 | 1.36  | 0.36     | 16076862 |
| YH-Sheep-127 | 1.31  | 0.32     | 13145590 |
| YH-Sheep-128 | 1.33  | 0.31     | 14166404 |

| <b>Sample Name</b> | <b>Depth</b> | <b>Coverage</b> | <b>Reads</b> |
|--------------------|--------------|-----------------|--------------|
| YH-Sheep-129       | 1.31         | 0.32            | 13531778     |
| YH-Sheep-130       | 1.36         | 0.38            | 12701288     |
| YH-Sheep-131       | 1.30         | 0.31            | 12680966     |
| YH-Sheep-132       | 1.32         | 0.31            | 11755996     |
| YH-Sheep-133       | 1.27         | 0.29            | 11043064     |
| YH-Sheep-134       | 1.26         | 0.27            | 11712110     |
| YH-Sheep-135       | 1.28         | 0.29            | 11229422     |
| YH-Sheep-136       | 1.28         | 0.28            | 11312464     |
| YH-Sheep-137       | 1.29         | 0.29            | 10515380     |
| YH-Sheep-138       | 1.26         | 0.26            | 11732656     |
| YH-Sheep-139       | 1.29         | 0.29            | 13674258     |
| YH-Sheep-140       | 1.36         | 0.33            | 11785346     |
| YH-Sheep-141       | 1.28         | 0.29            | 10296560     |
| YH-Sheep-142       | 1.27         | 0.26            | 12498262     |
| YH-Sheep-143       | 1.29         | 0.29            | 11262522     |
| YH-Sheep-144       | 1.28         | 0.28            | 11904870     |
| YH-Sheep-145       | 1.29         | 0.28            | 12953392     |
| YH-Sheep-146       | 1.30         | 0.30            | 12226238     |
| YH-Sheep-147       | 1.29         | 0.30            | 12250158     |
| YH-Sheep-148       | 1.37         | 0.33            | 14672722     |
| YH-Sheep-149       | 1.32         | 0.33            | 13795518     |
| YH-Sheep-150       | 1.29         | 0.31            | 13666194     |
| YH-Sheep-151       | 1.30         | 0.31            | 14687360     |
| YH-Sheep-153       | 1.33         | 0.34            | 13666194     |

**Table S2.** List of 128 potential candidate genes within ROH islands in the Hu sheep.

| Chr | Gene Start<br>(bp) | Gene End<br>(bp) | Gene Name       | Ensembl Gene ID    |
|-----|--------------------|------------------|-----------------|--------------------|
| 1   | 27288843           | 27325319         | <i>RNF11</i>    | ENSOARG00020004026 |
| 2   | 1.23E+08           | 1.23E+08         | <i>LGSN</i>     | ENSOARG00020015419 |
| 2   | 1.23E+08           | 1.23E+08         | <i>OCA2</i>     | ENSOARG00020015487 |
| 2   | 1.23E+08           | 1.23E+08         | <i>HERC2</i>    | ENSOARG00020015875 |
| 3   | 1.13E+08           | 1.13E+08         | <i>ZC3H8</i>    | ENSOARG00020001922 |
| 3   | 1.13E+08           | 1.13E+08         | <i>ZC3H6</i>    | ENSOARG00020001977 |
| 5   | 45548809           | 45558086         | <i>R3HDM4</i>   | ENSOARG00020012831 |
| 5   | 45561363           | 45564709         | <i>KISS1R</i>   | ENSOARG00020012927 |
| 5   | 45577442           | 45605740         | <i>ARID3A</i>   | ENSOARG00020013070 |
| 5   | 45612574           | 45617592         | <i>WDR18</i>    | ENSOARG00020013193 |
| 5   | 45622020           | 45631253         | <i>GRIN3B</i>   | ENSOARG00020013299 |
| 5   | 45631701           | 45638037         | <i>TMEM259</i>  | ENSOARG00020013430 |
| 5   | 45671806           | 45684186         | <i>ARHGAP45</i> | ENSOARG00020014441 |
| 5   | 45701349           | 45728657         | <i>SBNO2</i>    | ENSOARG00020015016 |
| 5   | 45763394           | 45779202         | <i>STK11</i>    | ENSOARG00020015219 |
| 5   | 45780799           | 45786768         | <i>CBARP</i>    | ENSOARG00020015344 |
| 5   | 45791439           | 45793371         | <i>ATP5F1D</i>  | ENSOARG00020015444 |
| 5   | 45816115           | 45823436         | <i>CIRBP</i>    | ENSOARG00020015562 |
| 5   | 45821461           | 45824684         | <i>FAM174C</i>  | ENSOARG00020015682 |
| 5   | 45831412           | 45844715         | <i>EFNA2</i>    | ENSOARG00020015712 |
| 5   | 45894462           | 45907926         | <i>PWWP3A</i>   | ENSOARG00020015787 |
| 5   | 45915035           | 45920824         | <i>NDUFS7</i>   | ENSOARG00020015840 |
| 5   | 45921243           | 45924269         | <i>GAMT</i>     | ENSOARG00020015902 |
| 5   | 45931282           | 45949747         | <i>DAZAP1</i>   | ENSOARG00020015974 |
| 5   | 52061481           | 52096528         | <i>CDC25C</i>   | ENSOARG00020014762 |
| 5   | 52106512           | 52109997         | <i>FAM53C</i>   | ENSOARG00020015352 |
| 5   | 52115380           | 52173526         | <i>KDM3B</i>    | ENSOARG00020015437 |
| 5   | 52176357           | 52181066         | <i>REEP2</i>    | ENSOARG00020015925 |
| 5   | 52263951           | 52278149         | <i>HSPA9</i>    | ENSOARG00020016252 |
| 5   | 52278568           | 52610584         | <i>CTNNA1</i>   | ENSOARG00020016402 |
| 5   | 52548172           | 52550074         | <i>LRRTM2</i>   | ENSOARG00020016498 |
| 5   | 52619483           | 52886681         | <i>SIL1</i>     | ENSOARG00020016552 |
| 5   | 52992040           | 53008425         | <i>PAIP2</i>    | ENSOARG00020017952 |
| 5   | 53007611           | 53021506         | <i>SLC23A1</i>  | ENSOARG00020018006 |
| 5   | 53022713           | 53024812         | <i>MZB1</i>     | ENSOARG00020018100 |
| 5   | 53045014           | 53070802         | <i>DNAJC18</i>  | ENSOARG00020018261 |
| 5   | 53088964           | 53090746         | <i>SMIM33</i>   | ENSOARG00020018356 |
| 5   | 53094862           | 53099768         | <i>STING1</i>   | ENSOARG00020018383 |
| 6   | 33557755           | 33977806         | <i>UNC5C</i>    | ENSOARG00020019727 |

| Chr | Gene Start<br>(bp) | Gene End<br>(bp) | Gene Name        | Ensembl Gene ID    |
|-----|--------------------|------------------|------------------|--------------------|
| 6   | 33990928           | 34214488         | <i>BMPR1B</i>    | ENSOARG00020020206 |
| 6   | 34541043           | 34774247         | <i>PDLIM5</i>    | ENSOARG00020020424 |
| 6   | 34910771           | 34926294         | <i>HPGDS</i>     | ENSOARG00020020743 |
| 10  | 37362294           | 37388504         | <i>FGF9</i>      | ENSOARG00020004253 |
| 10  | 37445771           | 37497434         | <i>MICU2</i>     | ENSOARG00020004275 |
| 10  | 37505860           | 37562509         | <i>ZDHHC20</i>   | ENSOARG00020004328 |
| 10  | 37585964           | 37590661         | <i>SAP18</i>     | ENSOARG00020004477 |
| 10  | 37640815           | 37663713         | <i>LATS2</i>     | ENSOARG00020004530 |
| 10  | 37676610           | 37763326         | <i>XPO4</i>      | ENSOARG00020004563 |
| 10  | 37770987           | 37789871         | <i>EEF1AKMT1</i> | ENSOARG00020004604 |
| 10  | 37790795           | 37821687         | <i>IL17D</i>     | ENSOARG00020004623 |
| 10  | 37826129           | 37881608         | <i>IFT88</i>     | ENSOARG00020004679 |
| 10  | 37902431           | 37961104         | <i>CRYL1</i>     | ENSOARG00020004947 |
| 10  | 38031596           | 38032381         | <i>GJB6</i>      | ENSOARG00020005011 |
| 10  | 38083322           | 38084560         | <i>GJA3</i>      | ENSOARG00020005065 |
| 10  | 38101146           | 38164431         | <i>ZMYM2</i>     | ENSOARG00020005084 |
| 10  | 38215822           | 38232515         | <i>ZMYM5</i>     | ENSOARG00020005220 |
| 10  | 38243213           | 38292550         | <i>PSPC1</i>     | ENSOARG00020005341 |
| 10  | 38319717           | 38365729         | <i>MPHOSPH8</i>  | ENSOARG00020005393 |
| 10  | 38617017           | 38637015         | <i>ATP12A</i>    | ENSOARG00020006165 |
| 11  | 35721278           | 35730729         | <i>ALOX15B</i>   | ENSOARG00020022867 |
| 11  | 35752673           | 35763575         | <i>GUCY2D</i>    | ENSOARG00020023345 |
| 11  | 35801751           | 35815622         | <i>CNTROB</i>    | ENSOARG00020023412 |
| 11  | 35816656           | 35817885         | <i>TRAPPC1</i>   | ENSOARG00020023446 |
| 11  | 35834681           | 35858685         | <i>CHD3</i>      | ENSOARG00020023540 |
| 11  | 35906256           | 36008814         | <i>DNAH2</i>     | ENSOARG00020010512 |
| 11  | 36018253           | 36022202         | <i>EFNB3</i>     | ENSOARG00020011424 |
| 11  | 36024266           | 36035913         | <i>WRAP53</i>    | ENSOARG00020011477 |
| 11  | 36037234           | 36050137         | <i>TP53</i>      | ENSOARG00020011609 |
| 11  | 36057127           | 36061394         | <i>ATP1B2</i>    | ENSOARG00020011738 |
| 11  | 36075241           | 36080260         | <i>SHBG</i>      | ENSOARG00020011830 |
| 11  | 36089500           | 36102013         | <i>FXR2</i>      | ENSOARG00020012154 |
| 11  | 36101339           | 36109068         | <i>MPDU1</i>     | ENSOARG00020012323 |
| 11  | 36110820           | 36112834         | <i>CD68</i>      | ENSOARG00020012774 |
| 11  | 36113791           | 36189828         | <i>EIF4A1</i>    | ENSOARG00020012888 |
| 11  | 36120652           | 36128210         | <i>SENP3</i>     | ENSOARG00020013096 |
| 11  | 36130780           | 36132620         | <i>TNFSF13</i>   | ENSOARG00020013222 |
| 11  | 36134324           | 36141723         | <i>TNFSF12</i>   | ENSOARG00020013736 |
| 11  | 36180823           | 36200737         | <i>POLR2A</i>    | ENSOARG00020013804 |
| 11  | 36213780           | 36218033         | <i>ZBTB4</i>     | ENSOARG00020014211 |
| 11  | 36222232           | 36230447         | <i>CHRNA1</i>    | ENSOARG00020014250 |
| 11  | 36247152           | 36248967         | <i>SPEM2</i>     | ENSOARG00020014676 |

| Chr | Gene Start<br>(bp) | Gene End<br>(bp) | Gene Name        | Ensembl Gene ID    |
|-----|--------------------|------------------|------------------|--------------------|
| 11  | 36253944           | 36339436         | <i>EIF5A</i>     | ENSOARG00020014758 |
| 11  | 36255150           | 36264793         | <i>NLGN2</i>     | ENSOARG00020014909 |
| 11  | 36276073           | 36280070         | <i>PLSCR3</i>    | ENSOARG00020015038 |
| 11  | 36281191           | 36287396         | <i>TNK1</i>      | ENSOARG00020015110 |
| 11  | 36302296           | 36314335         | <i>ACAP1</i>     | ENSOARG00020015243 |
| 11  | 36331590           | 36333801         | <i>GPS2</i>      | ENSOARG00020017230 |
| 11  | 36364136           | 36368808         | <i>SLC2A4</i>    | ENSOARG00020017448 |
| 11  | 36381720           | 36383714         | <i>CLDN7</i>     | ENSOARG00020017686 |
| 11  | 36390277           | 36396534         | <i>CTDNEP1</i>   | ENSOARG00020017866 |
| 11  | 36394612           | 36403886         | <i>GABARAP</i>   | ENSOARG00020017939 |
| 11  | 36401088           | 36405210         | <i>PHF23</i>     | ENSOARG00020018070 |
| 11  | 36406199           | 36413251         | <i>DVL2</i>      | ENSOARG00020018284 |
| 11  | 36414027           | 36421963         | <i>ACADVL</i>    | ENSOARG00020018512 |
| 11  | 36420278           | 36443824         | <i>DLG4</i>      | ENSOARG00020019051 |
| 13  | 52690746           | 52753392         | <i>HAO1</i>      | ENSOARG00020003549 |
| 13  | 52972788           | 52996005         | <i>ADRA1D</i>    | ENSOARG00020003607 |
| 13  | 55947893           | 55966102         | <i>PCMTD2</i>    | ENSOARG00020009092 |
| 13  | 55981340           | 56016688         | <i>MYT1</i>      | ENSOARG00020009211 |
| 13  | 56079358           | 56085713         | <i>OPRL1</i>     | ENSOARG00020009569 |
| 13  | 56096150           | 56101676         | <i>RGS19</i>     | ENSOARG00020009662 |
| 13  | 56103189           | 56110487         | <i>TCEA2</i>     | ENSOARG00020009690 |
| 13  | 56130229           | 56132356         | <i>C20orf204</i> | ENSOARG00020009776 |
| 13  | 56134569           | 56169865         | <i>PRPF6</i>     | ENSOARG00020009838 |
| 13  | 56180219           | 56185755         | <i>ZNF512B</i>   | ENSOARG00020010099 |
| 13  | 56209667           | 56212074         | <i>DNAJC5</i>    | ENSOARG00020010877 |
| 13  | 56240589           | 56255424         | <i>TPD52L2</i>   | ENSOARG00020010989 |
| 13  | 56298871           | 56326994         | <i>ZBTB46</i>    | ENSOARG00020011728 |
| 13  | 56347151           | 56352866         | <i>ARFRP1</i>    | ENSOARG00020012087 |
| 13  | 56379608           | 56387570         | <i>STMN3</i>     | ENSOARG00020003323 |
| 13  | 56401600           | 56412293         | <i>GMEB2</i>     | ENSOARG00020003375 |
| 13  | 56417215           | 56418216         | <i>FNDC11</i>    | ENSOARG00020003472 |
| 13  | 56420892           | 56426769         | <i>SRMS</i>      | ENSOARG00020003498 |
| 13  | 56429472           | 56435767         | <i>PTK6</i>      | ENSOARG00020003662 |
| 13  | 56453555           | 56461060         | <i>EEF1A2</i>    | ENSOARG00020003758 |
| 13  | 56473081           | 56516091         | <i>KCNQ2</i>     | ENSOARG00020003802 |
| 13  | 56544051           | 56556529         | <i>CHRNA4</i>    | ENSOARG00020004285 |
| 13  | 56588370           | 56598084         | <i>ARFGAP1</i>   | ENSOARG00020004787 |
| 13  | 56619433           | 56622851         | <i>BIRC7</i>     | ENSOARG00020005025 |
| 13  | 56632628           | 56644231         | <i>YTHDF1</i>    | ENSOARG00020005076 |
| 13  | 56805894           | 56821189         | <i>SLC17A9</i>   | ENSOARG00020005151 |
| 13  | 56826542           | 56832218         | <i>GID8</i>      | ENSOARG00020005239 |
| 13  | 56887526           | 56904123         | <i>TCFL5</i>     | ENSOARG00020005326 |

| <b>Chr</b> | <b>Gene Start<br/>(bp)</b> | <b>Gene End<br/>(bp)</b> | <b>Gene Name</b> | <b>Ensembl Gene ID</b> |
|------------|----------------------------|--------------------------|------------------|------------------------|
| 13         | 56905051                   | 56923339                 | <i>COL9A3</i>    | ENSOARG00020005388     |
| 13         | 56926591                   | 56933668                 | <i>OGFR</i>      | ENSOARG00020005520     |
| 13         | 56936611                   | 56940173                 | <i>MRGBP</i>     | ENSOARG00020005556     |
| 17         | 40651758                   | 40707383                 | <i>NUDT6</i>     | ENSOARG00020010377     |
| 17         | 40707674                   | 40762443                 | <i>FGF2</i>      | ENSOARG00020010451     |



**Table S3.** GO terms and KEGG pathways enriched ( $p < 0.05$ ) based on ROH islands.

| ID         | Term                                                                  | P-Value  | Input number |
|------------|-----------------------------------------------------------------------|----------|--------------|
| oas05016   | Huntington disease                                                    | 0.000899 | 6            |
| oas04390   | Hippo signaling pathway                                               | 0.001507 | 5            |
| oas05226   | Gastric cancer                                                        | 0.001721 | 5            |
| oas03013   | RNA transport                                                         | 0.002496 | 5            |
| oas05218   | Melanoma                                                              | 0.006674 | 3            |
| oas05224   | Breast cancer                                                         | 0.008981 | 4            |
| oas04080   | Neuroactive ligand-receptor interaction                               | 0.013057 | 6            |
| oas04151   | PI3K-Akt signaling pathway                                            | 0.017555 | 6            |
| oas05033   | Nicotine addiction                                                    | 0.020279 | 2            |
| oas04919   | Thyroid hormone signaling pathway                                     | 0.025622 | 3            |
| oas05030   | Cocaine addiction                                                     | 0.027889 | 2            |
| oas04110   | Cell cycle                                                            | 0.030068 | 3            |
| oas04068   | FoxO signaling pathway                                                | 0.035523 | 3            |
| oas05213   | Endometrial cancer                                                    | 0.038738 | 2            |
| oas04550   | Signaling pathways regulating pluripotency of stem cells              | 0.038759 | 3            |
| oas04120   | Ubiquitin mediated proteolysis                                        | 0.042834 | 3            |
| oas00190   | Oxidative phosphorylation                                             | 0.044238 | 3            |
| oas05217   | Basal cell carcinoma                                                  | 0.047131 | 2            |
| oas04137   | Mitophagy - animal                                                    | 0.04838  | 2            |
| GO:0003677 | DNA binding                                                           | 0.030167 | 1            |
| GO:0005507 | copper ion binding                                                    | 0.030167 | 1            |
| GO:0045766 | positive regulation of angiogenesis                                   | 0.030167 | 1            |
| GO:0000981 | DNA-binding transcription factor activity, RNA polymerase II-specific | 0.030167 | 1            |
| GO:0070374 | positive regulation of ERK1 and ERK2 cascade                          | 0.04002  | 1            |
| GO:0005739 | mitochondrion                                                         | 0.04002  | 1            |
| GO:0030308 | negative regulation of cell growth                                    | 0.04002  | 1            |

**Table S4.** Candidate gene enrichment based on human GWAS and TWAS results.

| Gene          | ENSG ID            | Associated Diseases                                                                           | Main Associated Tissues                                                                                                                                                            |
|---------------|--------------------|-----------------------------------------------------------------------------------------------|------------------------------------------------------------------------------------------------------------------------------------------------------------------------------------|
| <i>FGF9</i>   | ENSG00000102678.6  | Vascular/heart problems, High blood pressure                                                  | Adipose<br>Subcutaneous,Adrenal Gland,Artery<br>Coronary,Lung,Testis                                                                                                               |
| <i>BMPR1B</i> | ENSG00000138696.10 | heart/cardiac problem                                                                         | Testis                                                                                                                                                                             |
| <i>EFNB3</i>  | ENSG00000108947.4  | hypertension                                                                                  | Brain Caudate basal ganglia,Brain Putamen<br>basal ganglia,Colon<br>Transverse,Ovary,Brain<br>Substantia nigra                                                                     |
| <i>LGSN</i>   | ENSG00000146166.16 | Blood clot, DVT, bronchitis, emphysema, asthma, rhinitis, eczema, allergy                     | Whole Blood, Lung, Small Intestine Terminal Ileum, Spleen,Testis                                                                                                                   |
| <i>OCA2</i>   | ENSG00000104044.15 | hepatitis                                                                                     | Muscle Skeletal                                                                                                                                                                    |
| <i>SPATA5</i> | ENSG00000145375.7  | Blood clot, DVT, bronchitis, emphysema, asthma, rhinitis, eczema, allergic rhinitis or eczema | Adipose Subcutaneous, Esophagus Muscularis, Ovary                                                                                                                                  |
| <i>HERC2</i>  | ENSG00000128731.15 | Senile cataract                                                                               | Brain Putamen basal ganglia,Breast Mammary Tissue, Ileum,Spleen,Stomach,Testis,<br>Artery Aorta,Brain Nucleus accumbens basal ganglia, Esophagus Muscularis,Heart Atrial Appendage |
| <i>MICU2</i>  | ENSG00000165487.13 | hypertension                                                                                  | Esophagus Muscularis,Heart Atrial Appendage                                                                                                                                        |
| <i>OCA2</i>   | ENSG00000104044.15 | hepatitis                                                                                     | Muscle Skeletal                                                                                                                                                                    |

| Gene          | ENSG ID            | Associated Diseases                                                                                    | Main Associated Tissues                                                                                                                                                                                           |
|---------------|--------------------|--------------------------------------------------------------------------------------------------------|-------------------------------------------------------------------------------------------------------------------------------------------------------------------------------------------------------------------|
| <i>SPATA5</i> | ENSG00000145375.7  | Blood clot, DVT, bronchitis, emphysema, asthma, rhinitis, eczema, allergy, allergic rhinitis or eczema | Adipose<br>Subcutaneous, Adipose Visceral Omentum, Artery Aorta, Brain Nucleus accumbens basal ganglia, Esophagus Muscularis, Heart Left Ventricle, Ovary, Pituitary, Uterus, Minor Salivary Gland, Joint Tissues |
| <i>GFRA3</i>  | ENSG00000146013.10 | Atrial fibrillation                                                                                    | Adipose Visceral Omentum, Testis, Vagina                                                                                                                                                                          |
| <i>CDC23</i>  | ENSG00000094880.10 | Male-specific factors - Hair/balding                                                                   | Brain Cerebellar Hemisphere, Thyroid                                                                                                                                                                              |
| <i>CDC25C</i> | ENSG00000158402.18 | Atrial fibrillation                                                                                    | Whole Blood, Esophagus Muscularis, Liver, Lung, Skin Sun Exposed Lower leg, Small Intestine Terminal Ileum                                                                                                        |
